# Supplementary material
Source: MDPI journal article supplement (https://www.mdpi.com/2036-7481/15/1/20)
Supplement: s1 [file s1]

Supplementary Tables

**Table S1.** Details of the antimycobacterial drugs used in this study.

| Name         | PubChem CID | Molecular Weight | Molecular Formula                                                            |
|--------------|-------------|------------------|------------------------------------------------------------------------------|
| Delamanid    | 6480466     | 534.491          | C <sub>25</sub> H <sub>25</sub> F <sub>3</sub> N <sub>4</sub> O <sub>6</sub> |
| Pretomanid   | 456199      | 359.26           | C <sub>14</sub> H <sub>12</sub> F <sub>3</sub> N <sub>3</sub> O <sub>5</sub> |
| Clofazimine  | 2794        | 473.407          | C <sub>27</sub> H <sub>22</sub> Cl <sub>2</sub> N <sub>4</sub>               |
| Bedaquiline  | 5388906     | 555.516          | C <sub>32</sub> H <sub>31</sub> BrN <sub>2</sub> O <sub>2</sub>              |
| Terizidone   | 65720       | 302.29           | C <sub>14</sub> H <sub>14</sub> N <sub>4</sub> O <sub>4</sub>                |
| Amithiozone  | 9568512     | 236.3            | C <sub>10</sub> H <sub>12</sub> N <sub>4</sub> OS                            |
| Dapsone      | 2955        | 248.307          | C <sub>12</sub> H <sub>12</sub> N <sub>2</sub> O <sub>2</sub> S              |
| Morinamide   | 70374       | 222.248          | C <sub>10</sub> H <sub>14</sub> N <sub>4</sub> O <sub>2</sub>                |
| Protionamide | 666418      | 180.276          | C <sub>9</sub> H <sub>12</sub> N <sub>2</sub> S                              |
| Isoniazid    | 3767        | 137.142          | C <sub>6</sub> H <sub>7</sub> N <sub>3</sub> O                               |
| Ethionamide  | 2761171     | 166.249          | C <sub>8</sub> H <sub>10</sub> N <sub>2</sub> S                              |
| Pyrazinamide | 1046        | 123.115          | C <sub>5</sub> H <sub>5</sub> N <sub>3</sub> O                               |
| Ethambutol   | 14052       | 204.314          | C <sub>10</sub> H <sub>24</sub> N <sub>2</sub> O <sub>2</sub>                |
| Cycloserine  | 6234        | 102.093          | C <sub>3</sub> H <sub>6</sub> N <sub>2</sub> O <sub>2</sub>                  |

**Table S2.** Details of the target proteins of *P. aeruginosa* used in this study.

| S. No. | Protein | PDB ID | Size of Grid |    |    | Centre of Grid |         |         |
|--------|---------|--------|--------------|----|----|----------------|---------|---------|
|        |         |        | x            | y  | z  | x              | y       | z       |
| 1.     | LasA    | 3IT7   | 46           | 38 | 46 | 23.512         | 4.315   | -11.282 |
| 2.     | LasI    | 1RO5   | 50           | 46 | 46 | 39.183         | -11.983 | -11.794 |
| 3.     | LasR    | 2UV0   | 34           | 50 | 46 | 25.471         | 35.493  | 42.516  |
| 4.     | PqsR    | 4JVI   | 50           | 46 | 48 | -27.568        | 62.524  | 10.084  |
| 5.     | RhlR    | 8DQ1   | 52           | 56 | 66 | 131.366        | 138.844 | 165.832 |

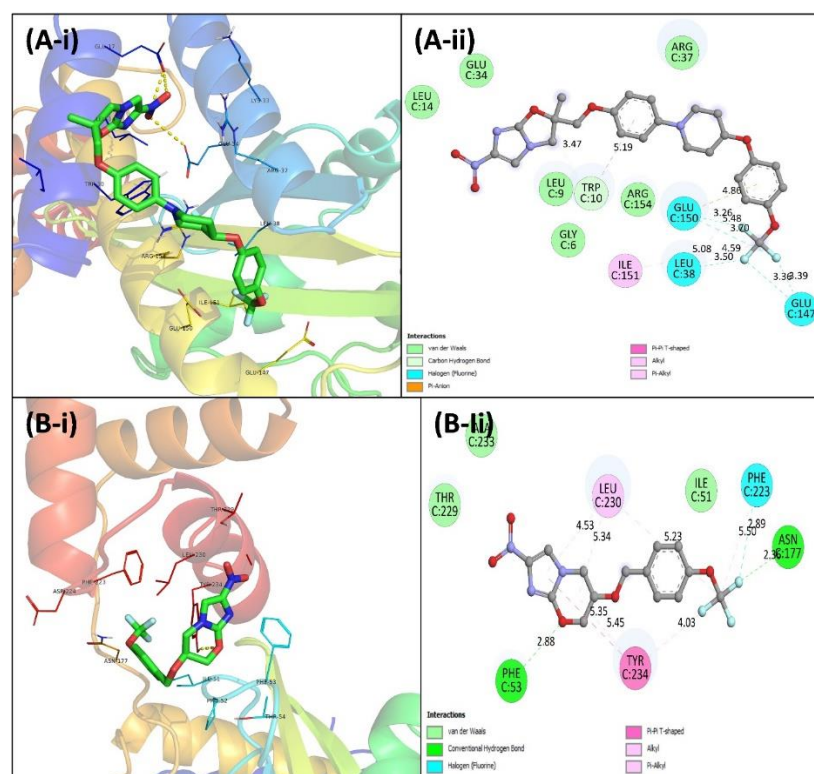

**Figure S1.** (A) Docked pose of the RhlR-delamanid complex. (A-i) Three-dimensional representation of the RhlR-delamanid complex; delamanid is shown as sticks. RhlR is shown as a coloured ribbon in which interacting residues are heightened. (A-ii) Two-dimensional representation of the RhlR-delamanid complex prepared using Discovery Studio 2021. (B) Docked pose of the RhlR-pretomanid complex. (B-i) Three-dimensional representation of the RhlR-pretomanid complex; pretomanid is shown as sticks. RhlR is shown as a coloured ribbon in which interacting residues are heightened. (B-ii) Two-dimensional representation of the RhlR-pretomanid complex prepared using Discovery Studio 2021.

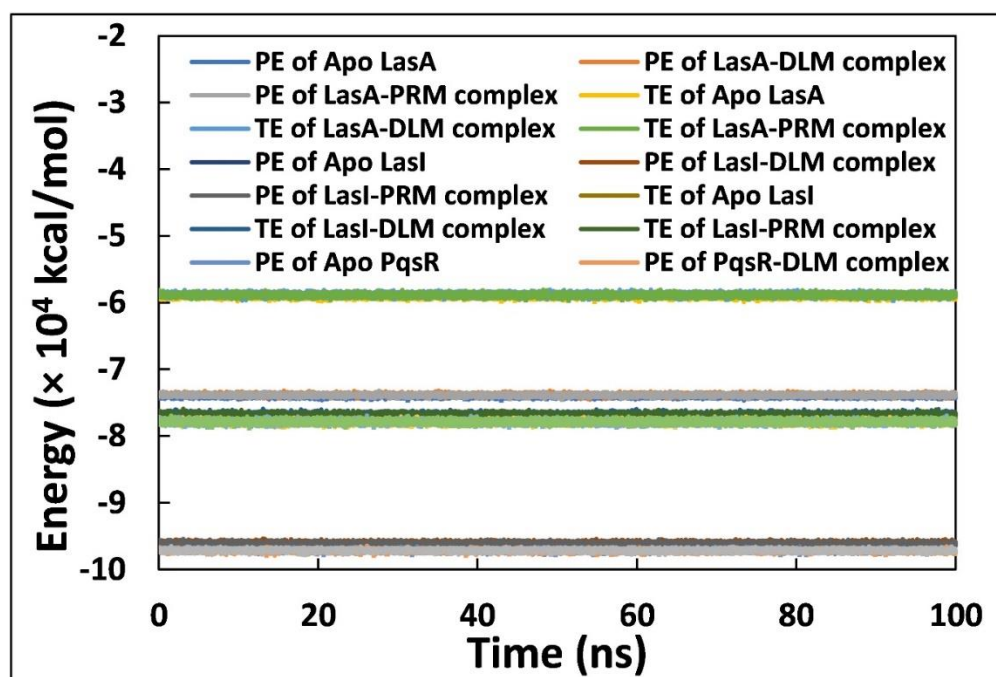

**Figure S2.** Total energy and potential energy of apo LasA, LasA-delamanid complex, LasA-pretomanid complex, apo LasI, LasI-delamanid complex, LasI-pretomanid complex, apo PqsR, PqsR-delamanid complex, and PqsR-pretomanid complex as a function of time.

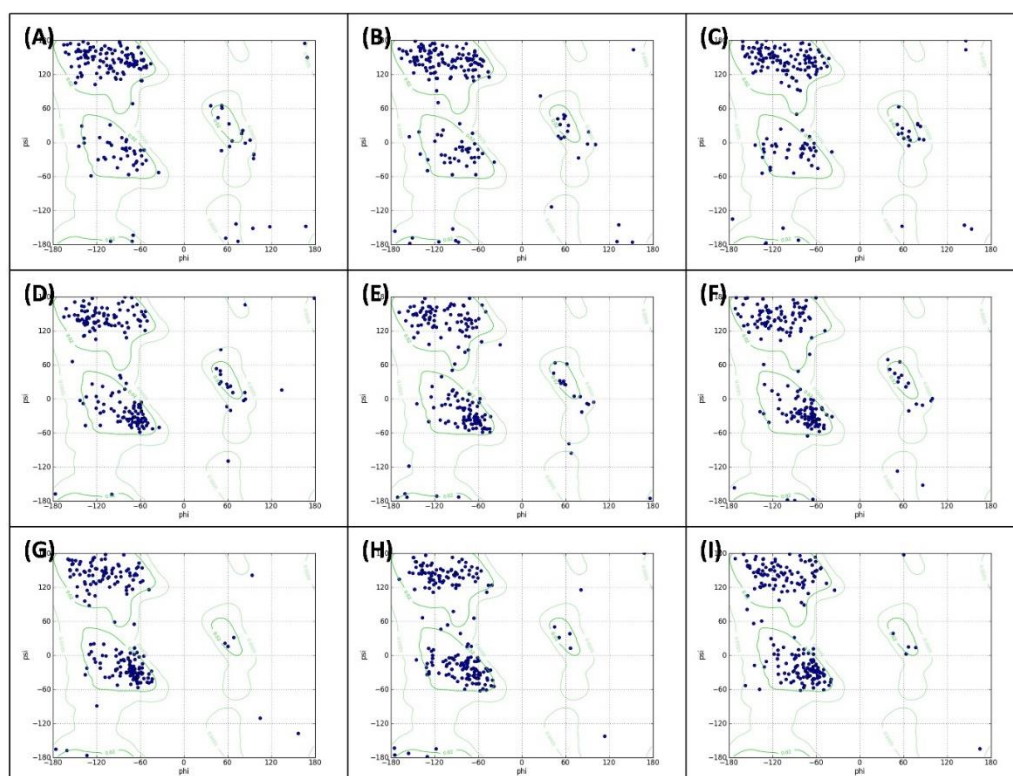

**Figure S3.** (A) Ramachandran plot of energy minima structure of apo LasA. (B) Ramachandran plot of energy minima structure of LasA-delamanid complex. (C) Ramachandran plot of energy minima structure of LasA-pretomanid complex. (D) Ramachandran plot of energy minima structure of apo LasI. (E) Ramachandran plot of energy minima structure of LasI-delamanid complex. (F) Ramachandran plot of energy minima structure of LasI-pretomanid complex. (G) Ramachandran plot of energy minima structure of apo PqsR. (H) Ramachandran plot of energy minima structure of PqsR-delamanid complex. (I) Ramachandran plot of energy minima structure of PqsR-pretomanid complex.
